# Supplementary material for: H2O-Improved O2 activation on the Pd–Au bimetallic surface
Source: Royal Society of Chemistry journal article supplement (doi:10.1039/c7cc01542a), 2017-01-01
Supplement: c7cc01542a1.pdf [file c7cc01542a1.pdf]

**Supporting information**

# H<sub>2</sub>O-Improved O<sub>2</sub> Activation on the Pd–Au Bimetallic Surface

*Sungmin Han,<sup>†</sup> Edward J. Evans,<sup>†</sup> Gregory M. Mullen,<sup>‡</sup> C. Buddie Mullins<sup>\*†,‡</sup>*

<sup>†</sup>Department of Chemistry, <sup>‡</sup>McKetta Department of Chemical Engineering, Center for Nano and  
Molecular Science and Technology, Texas Materials Institute, Center for Electrochemistry,  
University of Texas at Austin, Austin, Texas 78712-0231, United States

## Experimental section

The experiments were performed in a UHV chamber which has been described previously,<sup>1</sup> however brief details regarding the apparatus and experiments are described below. The Au (111) single crystal sample (12 mm in diameter  $\times$  2 mm thickness) is held in the UHV chamber by a Mo wire that can resistively heat the sample and also provide thermal contact with a liquid nitrogen bath. For the preparation of the Pd–Au bimetallic model surface, we believe the growth of Pd overlayers on Au (111) is governed by a layer-by-layer mechanism, in which the Pd atoms can diffuse in to the bulk of the Au (111) sample upon heating to form a Pd–Au alloy at the surface.<sup>2</sup> The Pd–Au surface for this study was made by depositing 2.5 ML of Pd atoms from a homemade thermal evaporator onto the Au (111) surface at 77 K, and then the surface was annealed at 500 K for 10 min. All the gas molecules were delivered to the sample surface via a collimated molecular beam, enabling accurate control of the number of target molecules impinging on our model catalyst. We also utilized a Fourier transform infrared (FTIR) spectrometer with a mercury-cadmium-telluride (MCT) detector cooled by liquid nitrogen for reflection-adsorption infrared spectroscopy (RAIRS).

## RAIRS spectra of H<sub>2</sub>O on various Pd–Au surface

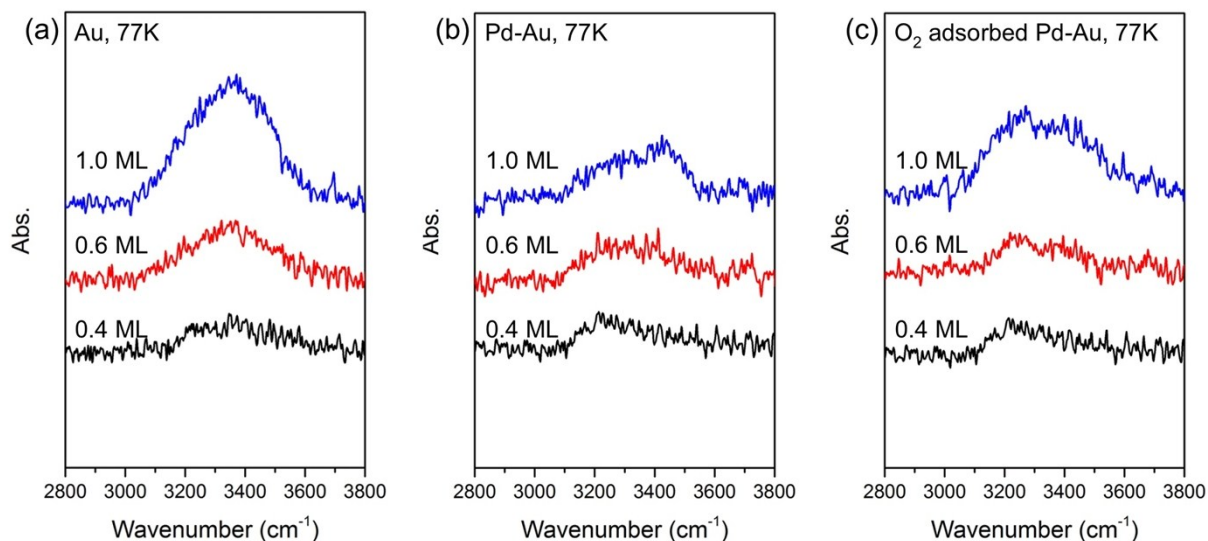

**Figure S1.** RAIRS spectra measured in the region of O–H bond frequencies for 0.4 ML, 0.6 ML, and 1.0 ML of H<sub>2</sub>O impinged on (a) Au (111) (b) Pd–Au (111), and (c) 1.0 ML of O<sub>2</sub> adsorbed Pd–Au (111) surface. All those spectra were measured at 77 K, and the H<sub>2</sub>O coverages were controlled based on the results from the H<sub>2</sub>O desorption on Pd–Au surface (Figure 1b).

As indicated in Figure S1b, when the Pd–Au surface is covered with 0.4 ML of H<sub>2</sub>O, RAIRS shows a peak near 3200 cm<sup>-1</sup>, but the overall spectrum becomes broader with 0.6 ML of H<sub>2</sub>O, and then 1.0 ML of H<sub>2</sub>O makes two different regions, 3100 cm<sup>-1</sup> – 3360 cm<sup>-1</sup> and 3360 cm<sup>-1</sup> – 3540 cm<sup>-1</sup>, corresponding to weaker O–H bonds induced by stronger Pd–H<sub>2</sub>O interactions (177 K peak on TPD in Figure 1b) and stronger O–H bonds with weaker Pd–H<sub>2</sub>O interactions (160 K peak on TPD in Figure 1b). As a reference, we also measured RAIRS for H<sub>2</sub>O on Au (111) where the H<sub>2</sub>O molecules are not so strongly interacting with the surface, and here there is just a broad spectrum for the different coverages as shown in Figure S1a. The intensity of each spectrum increases with H<sub>2</sub>O coverage since more H<sub>2</sub>O molecules make more H-bonds among them. This interpretation is

also supported by the TPD results shown in Figure S2, which shows a peak temperature for each H<sub>2</sub>O coverage on Au (111) that is shifted a little bit from near 140 K to 146 K as coverage increases.

Increasing the amount of H<sub>2</sub>O coverage on the 1ML of O<sub>2</sub> adsorbed Pd–Au surface, it also shows two different regions for O–H bond frequencies. Different from the H<sub>2</sub>O solely adsorbed cases, however, the intensity for the lower frequency region in the 1.0 ML of H<sub>2</sub>O / 1ML of O<sub>2</sub> adsorbed Pd–Au surface, 3100 cm<sup>-1</sup> – 3250 cm<sup>-1</sup> for the relatively weaker O–H bonds (180 K peak on TPD in Figure 2b), is higher than the higher frequency region, 3250 cm<sup>-1</sup> – 3500 cm<sup>-1</sup> for the relatively stronger O–H bonds (152 K peak on TPD in Figure 2b), depending on the degree of interactions with the adsorbed O<sub>2</sub> on the Pd–Au surface.

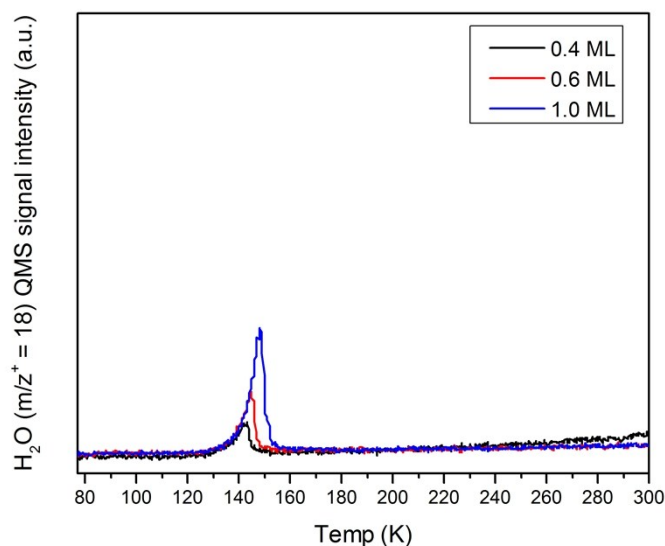

**Figure S2.** TPD results for H<sub>2</sub>O (m/z<sup>+</sup> = 18) from 0.4 ML, 0.6 ML, 1.00 ML of H<sub>2</sub>O adsorbed Au (111).

## O<sub>2</sub> adsorption on 1 ML of H<sub>2</sub>O covered Pd–Au surface.

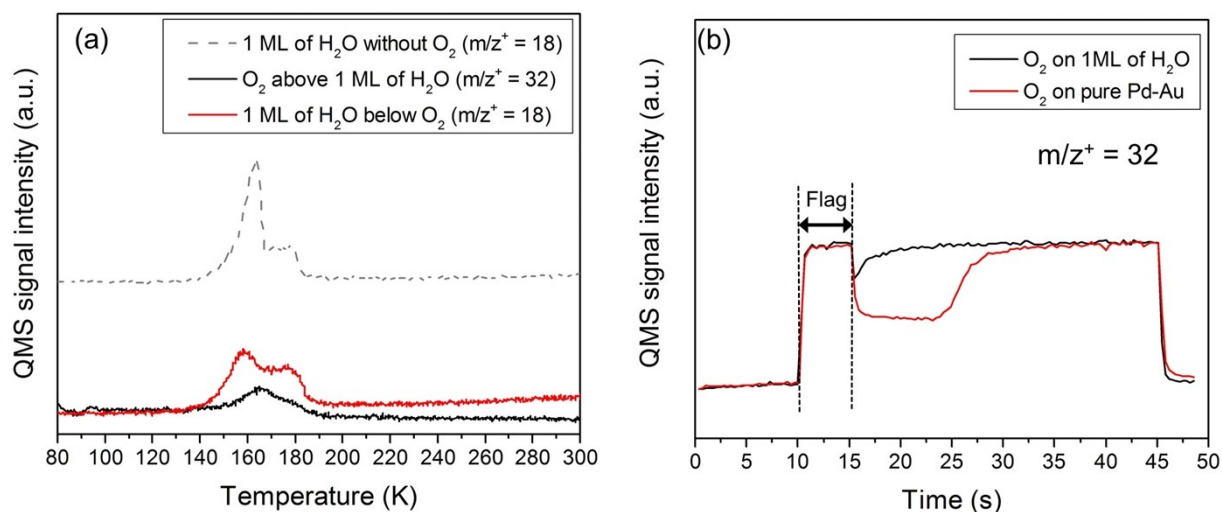

**Figure S3.** (a) TPD spectra of 1 ML of H<sub>2</sub>O without O<sub>2</sub> (gray dotted line) and small amount of O<sub>2</sub> (black solid line) adsorbed above 1 ML of H<sub>2</sub>O (red solid line) on the Pd–Au surface and (b) King and Wells measurements of O<sub>2</sub> directly adsorbed on the Pd–Au surface (red solid line) and 1 ML of H<sub>2</sub>O pre-adsorbed Pd–Au surface (black solid line).

As described in Figure S3a and S3b, relatively small amount of O<sub>2</sub> molecules are adsorbed on 1 ML of H<sub>2</sub>O pre-adsorbed Pd–Au surface compared to the pure Pd–Au surface. However, even this small amount of O<sub>2</sub> admolecules clearly affects the desorption of the pre-adsorbed H<sub>2</sub>O molecules, where they simultaneously desorb in the range of 140 K – 190 K.

## Isotopically labeled $\text{H}_2^{18}\text{O}$ used TPD and CO-RMBS

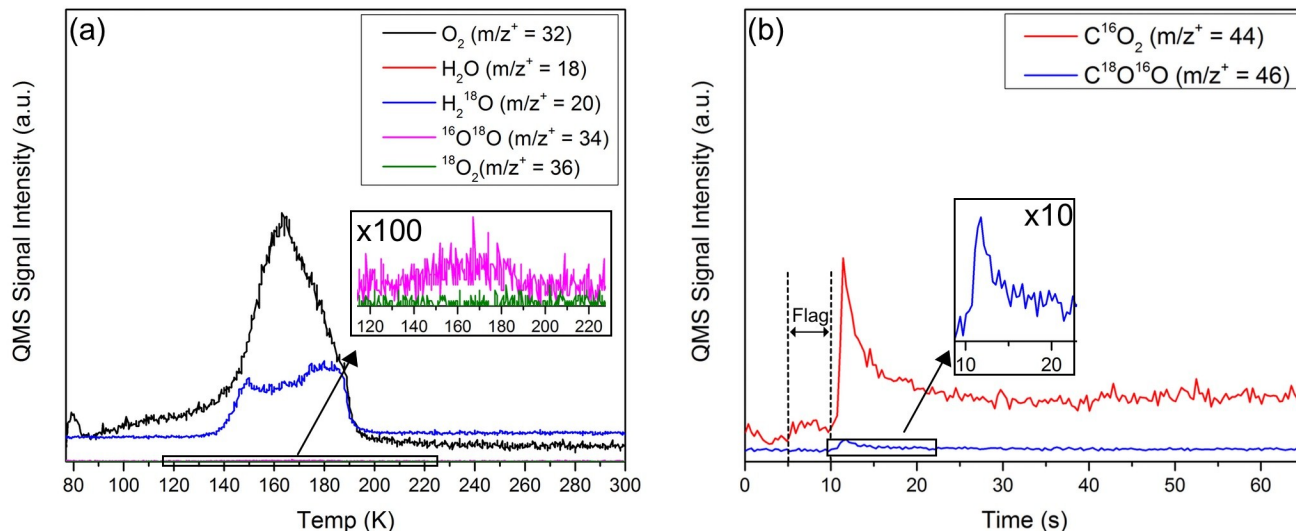

**Figure S4.** (a) TPD and (b) CO-RMBS results from 1.0 ML  $\text{H}_2^{18}\text{O}$  and 1.0 ML  $\text{O}_2$  adsorbed Pd–Au surface. The inset in (a) shows a very low desorption of  $^{16}\text{O}^{18}\text{O}$ , and the inset in (b) also describes a very low generation of  $\text{C}^{18}\text{O}^{16}\text{O}$ .

In our TPD experiments for  $\text{H}_2\text{O}$  and  $\text{O}_2$  co-adsorbed on the Pd–Au surface, as shown in Figure 2, we do not observe another  $\text{H}_2\text{O}$  desorption peak around 240 K which would be related to the associative desorption of hydroxyl ( $-\text{OH}$ ) groups on the surface, and which has been reported in previous Pd model catalyst studies.<sup>3,4</sup> For the Pd–Au bimetallic surface case, thus, it is expected that  $\text{O}_2$  and  $\text{H}_2\text{O}$  molecules tend to form H-bonded complexes instead of making hydroxyls ( $-\text{OH}$ ) by dissociating  $\text{O}=\text{O}$  and  $\text{H}-\text{OH}$  bonds. To confirm this, we also conducted TPD experiments using  $\text{H}_2^{18}\text{O}$  with  $^{16}\text{O}_2$  co-adsorbed on the Pd–Au model surface to measure the generation of  $^{16}\text{O}^{18}\text{O}$  ( $m/z^+ = 34$ ). Based on our previous study regarding co-adsorbed  $\text{H}_2^{18}\text{O}$  with atomic O on an Au (111) surface,<sup>5</sup> formation of adsorbed hydroxyls ( $-\text{OH}$ ), should generate  $^{16}\text{O}^{18}\text{O}$  ( $m/z^+ = 34$ ) during TPD via the associative desorption of  $\text{O}_2$  from the coupling of the isotopically labeled hydroxyls ( $^{16}\text{OH} + ^{18}\text{OH}$ ). However, in testing with 1.0 ML of  $\text{H}_2^{18}\text{O}$  and 1.0 ML of  $\text{O}_2$  co-adsorbed on the

model Pd–Au surface, we do not observe the generation of  $^{16}\text{O}^{18}\text{O}$  (see Figure S3a in which the signal for  $m/z^+ = 34$  is very small compared to the  $^{16}\text{O}_2$  ( $m/z^+ = 32$ ) signal). Therefore, we conclude that co-adsorbed  $\text{O}_2$  and  $\text{H}_2\text{O}$  on the Pd–Au surface are more likely to form a strong H-bonded complex rather than adsorbed hydroxyls ( $-\text{OH}$ ).

Additionally, we also conducted CO-RMBS experiments on a 1.0 ML of  $\text{H}_2^{18}\text{O}$  + 1.0 ML of  $\text{O}_2$  co-adsorbed surface to test for the generation of  $\text{C}^{16}\text{O}^{18}\text{O}$  ( $m/z^+ = 46$ ). This is another way to check for the formation of hydroxyls from the interactions of adsorbed  $\text{H}_2\text{O}$  and  $\text{O}_2$  on the Pd–Au surface.<sup>6</sup> In Figure S3b, the intensity for  $\text{C}^{16}\text{O}^{18}\text{O}$  ( $m/z^+ = 46$ ) is much lower than for the standard  $\text{CO}_2$  ( $m/z^+ = 44$ ) signal, and the  $m/z^+ = 46$  signal only becomes visible by magnifying the scale by a factor of 10. This very small signal is possibly caused by a tiny amount of  $^{18}\text{OH}$  on the surface. Therefore, from these results, it is expected once again that co-adsorbed  $\text{H}_2\text{O}$  and  $\text{O}_2$  molecules on our model Pd–Au surface are mainly forming a H-bonded complex, and only a small fraction of them exist as hydroxyls.

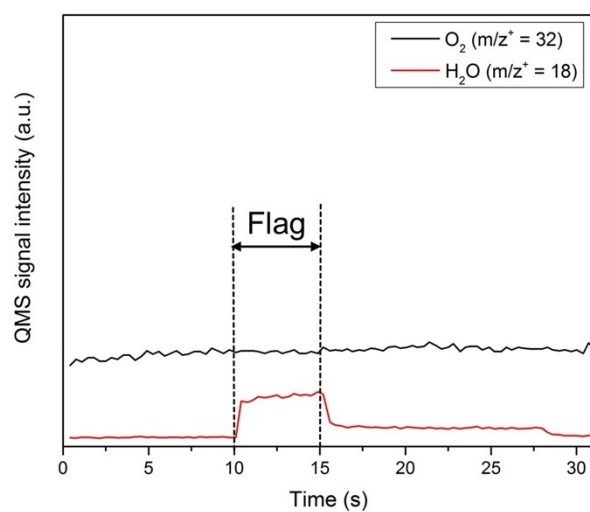

**Figure S5.** King-Wells measurement of a  $\text{H}_2\text{O}$  beam impinging on 1 ML of  $\text{O}_2$  covered Pd–Au surface. From 10 s to 15 s, the  $\text{H}_2\text{O}$  beam was directed to the inert flag and then hit the sample from 15 s to 28 s for impinging 1 ML of  $\text{H}_2\text{O}$ .

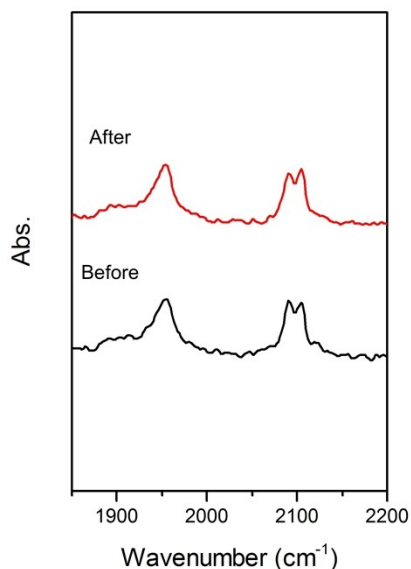

**Figure S6.** RAIRS spectra of saturated CO on Pd–Au (111) surface before (bare surface, black) and after (red) the adsorption and desorption of 1.0 ML of O<sub>2</sub> and 1.0 ML of H<sub>2</sub>O.

As shown in Figure S6, our Pd – Au (111) surface has Pd ensembles, which can be verified from the existence of vibrational frequencies for CO molecules on the continuous Pd sites ( $\nu_{\text{CO}}$ : 1900 – 2000 cm<sup>-1</sup>). Furthermore, the desorption of 1.0 ML H<sub>2</sub>O/ 1.0 ML O<sub>2</sub> negligibly affect the compositions of Pd ensembles because the IR spectra of before and after the desorption of O<sub>2</sub> / H<sub>2</sub>O are almost identical to each other.

| H <sub>2</sub> O coverages (ML) | O <sub>2</sub> desorption ratio in 77 K – 145 K (%) | O <sub>2</sub> desorption ratio in 145K – 165 K (%) | O <sub>2</sub> desorption ratio in 165 K – 200 K (%) | Total amount of O <sub>2</sub> desorption ratio in 77 K – 200 K (%) | Total amount of CO <sub>2</sub> generation ratio (%) |
|---------------------------------|-----------------------------------------------------|-----------------------------------------------------|------------------------------------------------------|---------------------------------------------------------------------|------------------------------------------------------|
| 0                               | 58.4                                                | 23.8                                                | 17.8                                                 | 100                                                                 | 32.2                                                 |
| 0.6                             | 44.5                                                | 24.2                                                | 31.3                                                 | 85.4                                                                | 65.5                                                 |
| 1                               | 28.2                                                | 28.9                                                | 42.9                                                 | 81.5                                                                | 100                                                  |
| 1.5                             | 24.2                                                | 35.6                                                | 40.2                                                 | 81.7                                                                | 100.2                                                |
| 2.1                             | 19.6                                                | 43.9                                                | 36.5                                                 | 84.8                                                                | 82.7                                                 |

**Table S1.** Estimated percentages for O<sub>2</sub> desorption and CO<sub>2</sub> generation on the basis of H<sub>2</sub>O coverages.

## References

- 1 D. W. Flaherty, N. T. Hahn, D. Ferrer, T. R. Engstrom, P. L. Tanaka and C. B. Mullins, *J. Phys. Chem. C*, 2009, **113**, 12742–12752.
- 2 B. E. Koel, A. Sellidj and M. T. Paffett, *Phys. Rev. B*, 1992, **46**, 7846–7856.
- 3 E. M. Stuve, S. W. Jorgensen and R. J. Madix, *Surf. Sci.*, 1984, **146**, 179–198.
- 4 C. Clay, L. Cummings and A. Hodgson, *Surf. Sci.*, 2007, **601**, 562–568.
- 5 R. A. Ojifinni, N. S. Froemming, J. Gong, M. Pan, T. S. Kim, J. M. White, G. Henkelman and C. B. Mullins, *J. Am. Chem. Soc.*, 2008, **130**, 6801–6812.
- 6 T. S. Kim, J. Gong, R. a. Ojifinni, J. M. White and C. B. Mullins, *J. Am. Chem. Soc.*, 2006, **128**, 6282–6283.
